# Supplementary material for: Ground state phases and optical properties in extended Peierls–Hubbard models for halogen-bridged binuclear metal complexes
Source: Royal Society of Chemistry journal article supplement (doi:10.1039/b101545l), 2001-01-01
Supplement: b101545l.doc [file b101545l.doc]

**
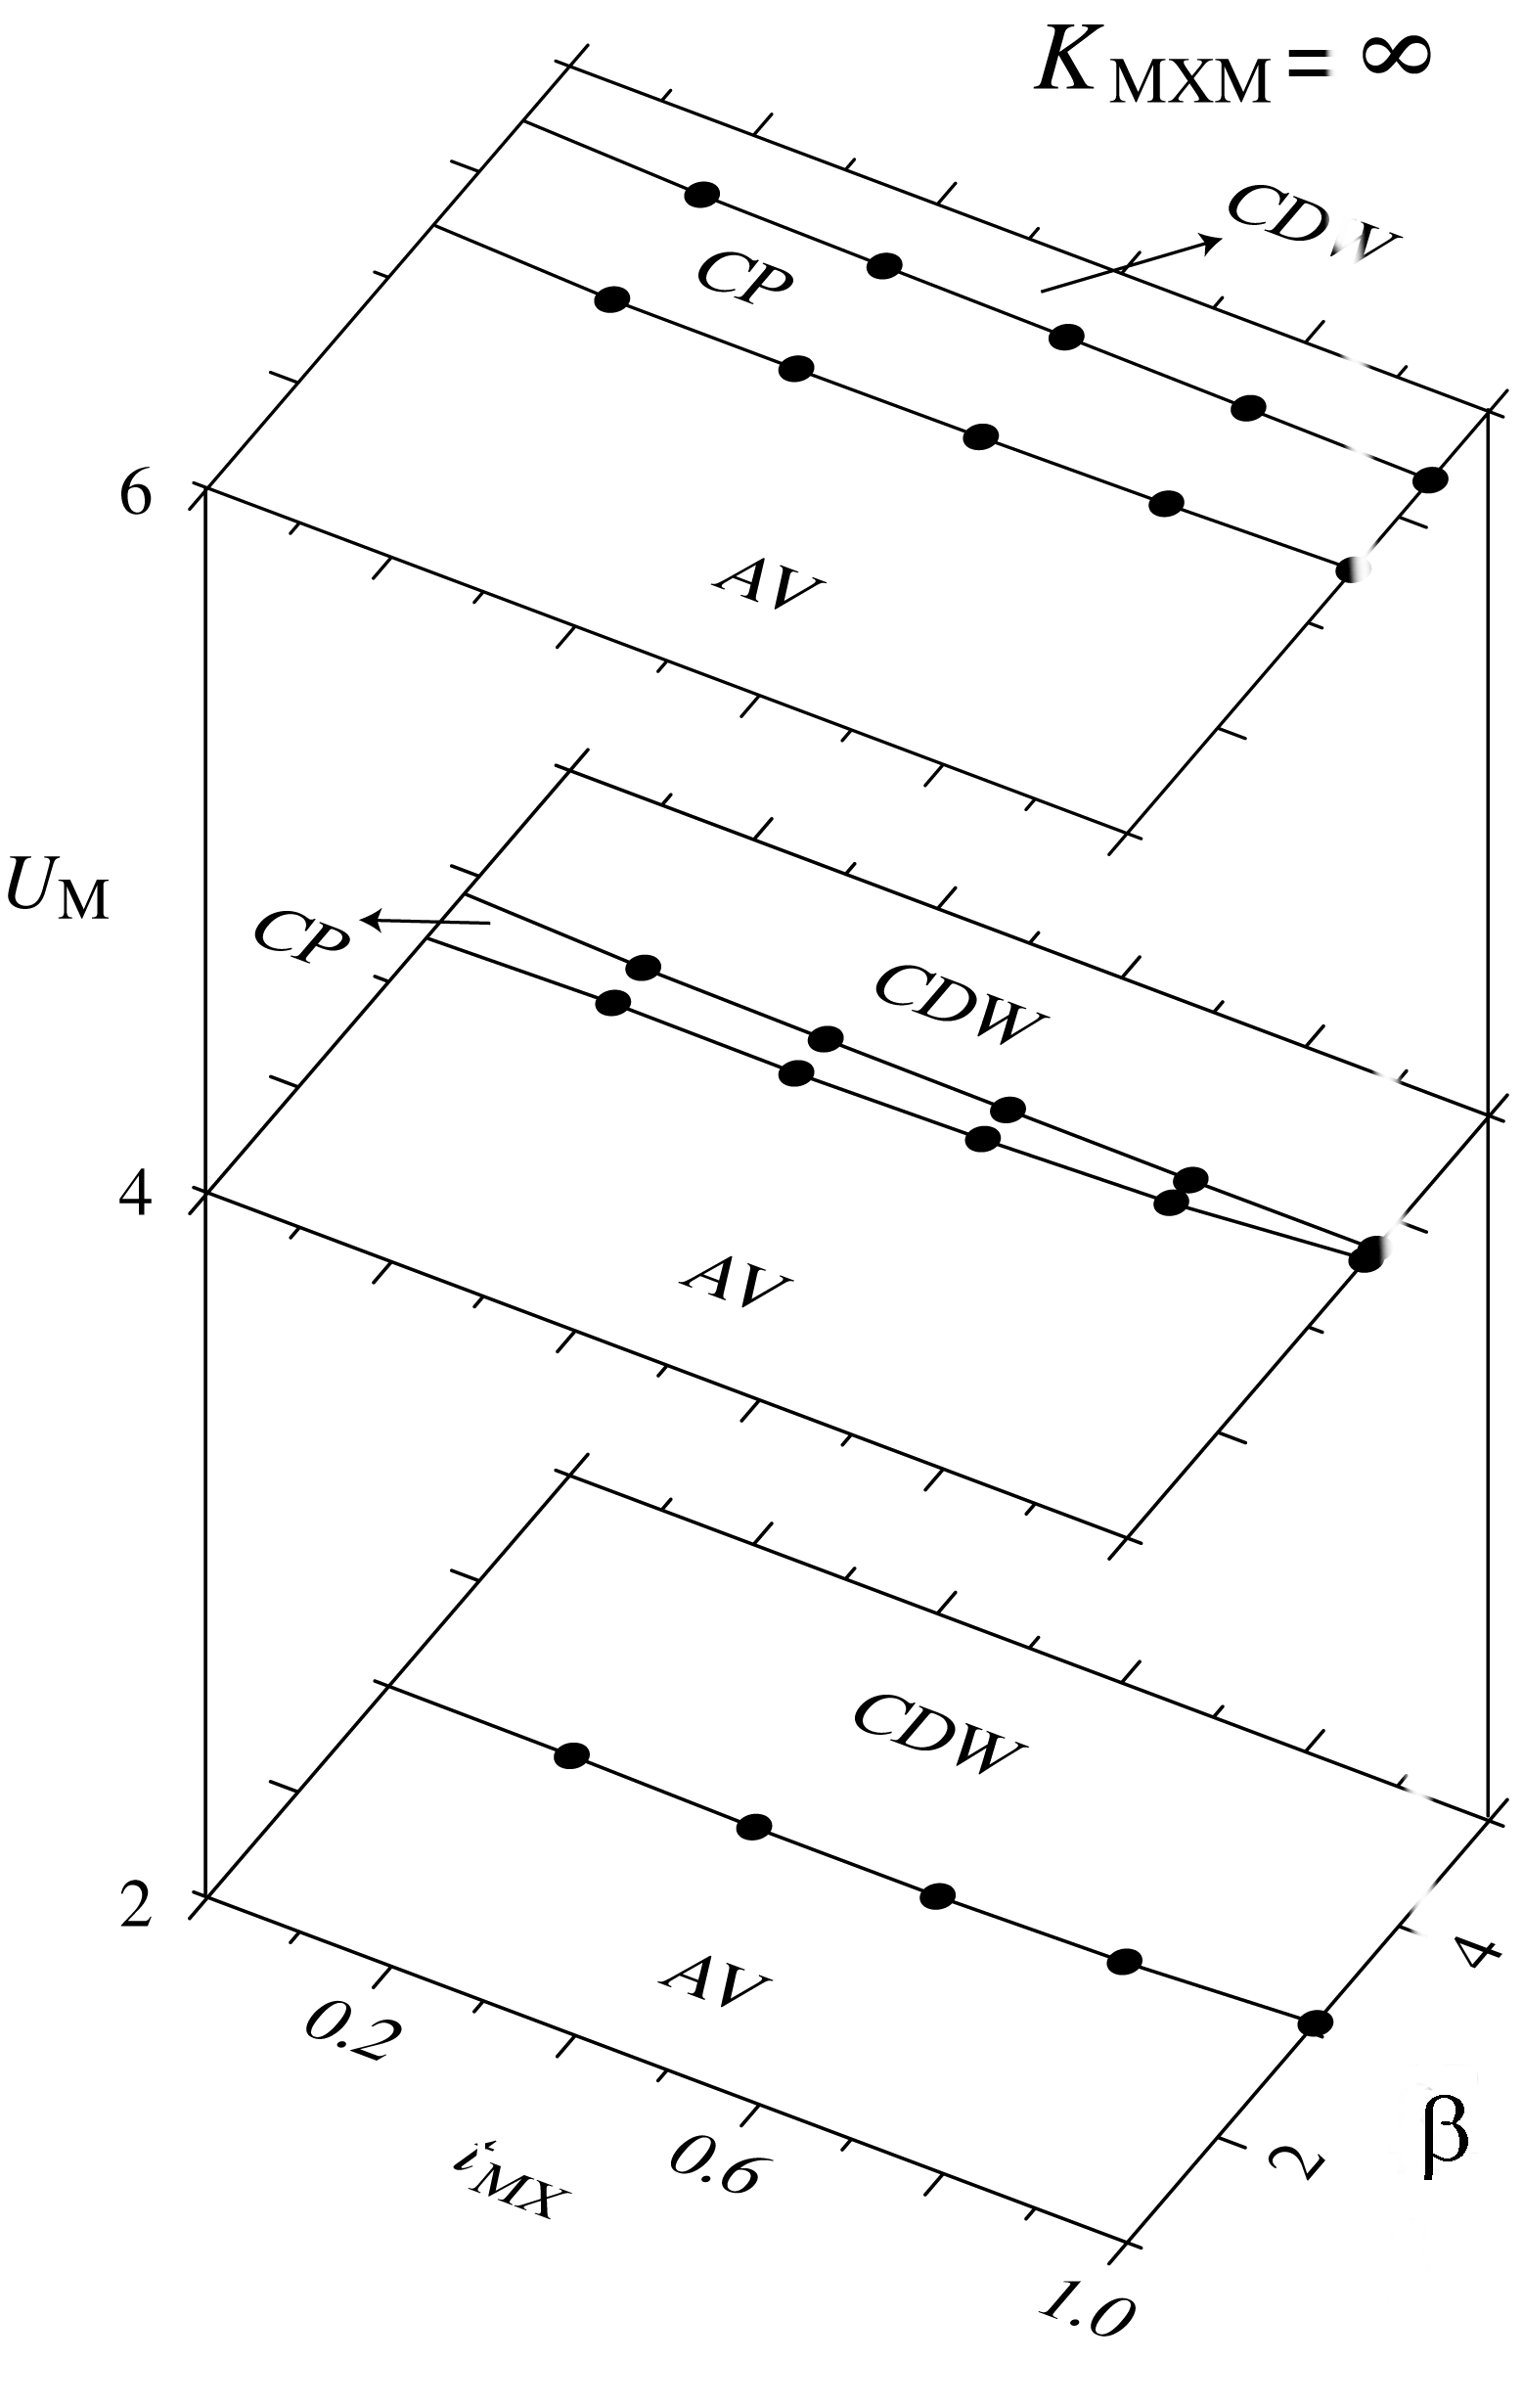
**

**Fig. S1** Ground-state phase diagram of the 18-site two-band model for infinitely large *KMXM*, in the *tMX* -**-*UM* space. The parameters are *tMM* =1,** =0.2,*M* *X*=0.5, *KMX* =6, *UX* = *UM* /2, *VMM* =0, and *VMX* =0.


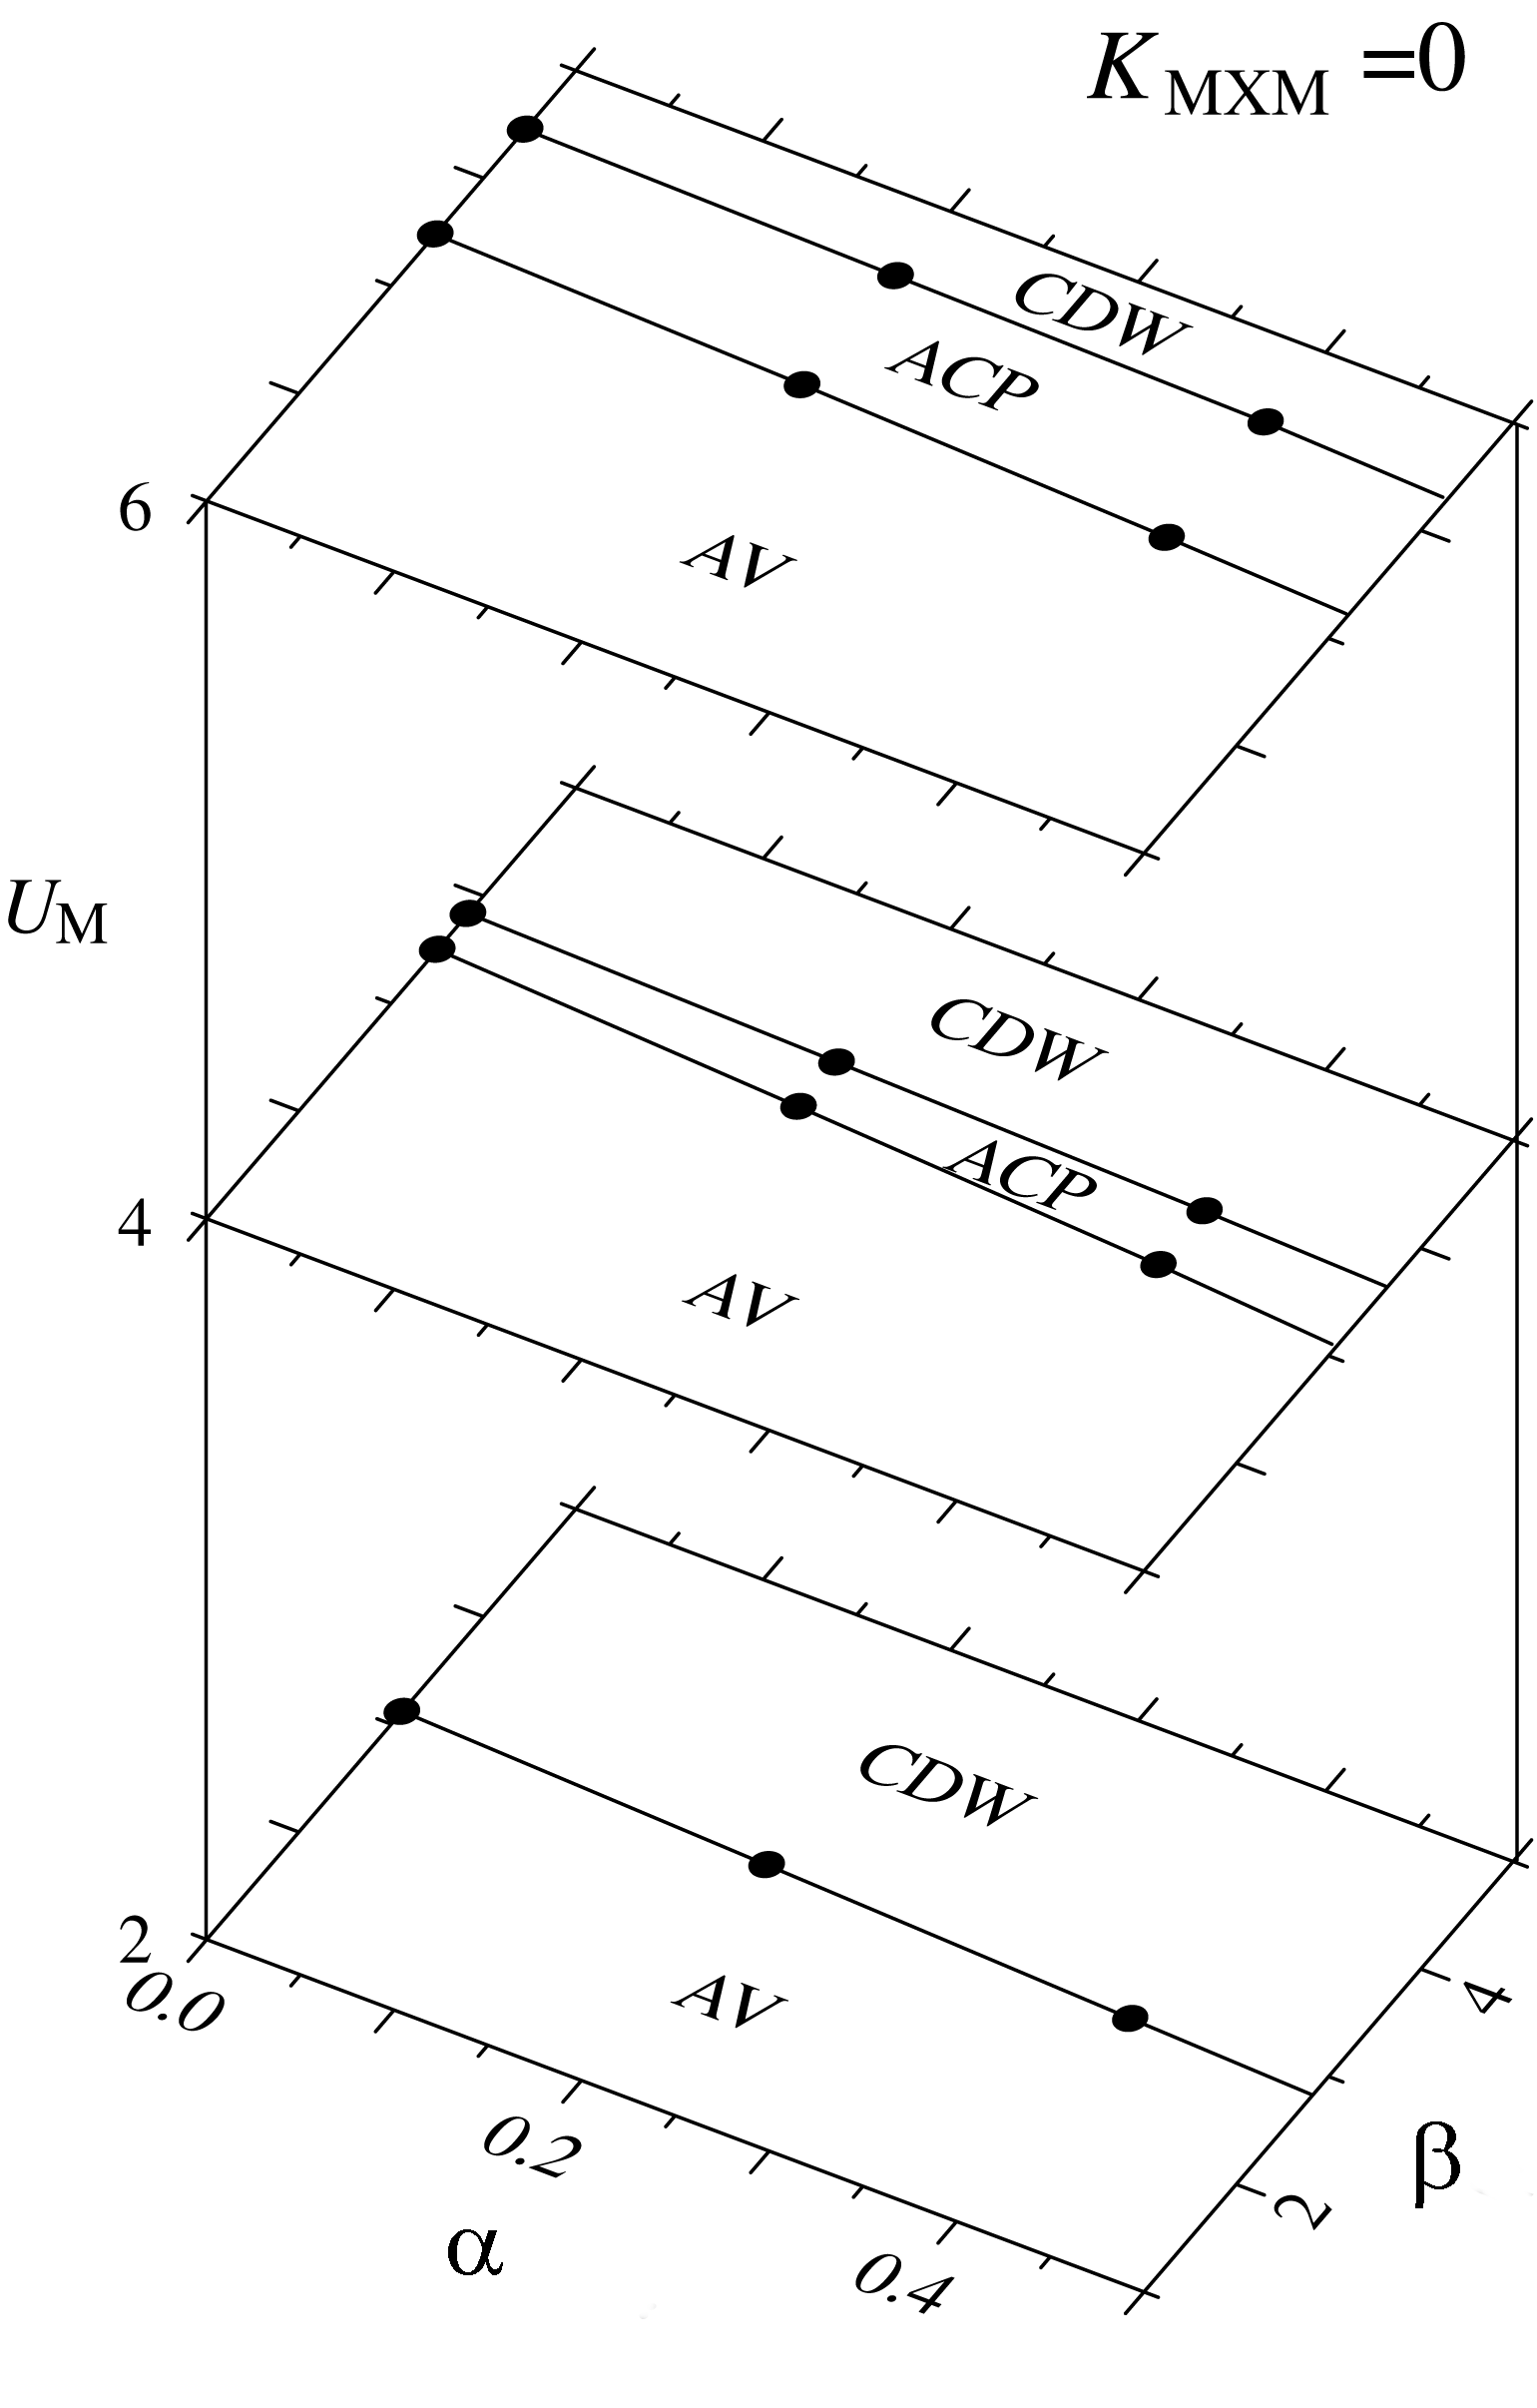


**Fig. S2** Ground-state phase diagram of the 18-site two-band model for *KMXM* =0, in the ** -**-*UM* space. The parameters are *tMM* =1, *tMX* =0.8,*M* *X*=0.5, *KMX* =6, *UX* = *UM* /2, *VMM* =0, and *VMX* =0.
